# Supplementary material for: Role of oxygen in wetting of copper nanoparticles on silicon surfaces at elevated temperature
Source: publisher site journal article supplement (doi:10.3762/bjnano.8.45), 2017-02-13
Supplement: Additional file 1 [file 2190-4286-8-45-S1.pdf]

# Supporting Information

for

## Role of oxygen in wetting of copper nanoparticles on silicon surfaces at elevated temperature

Tapas Ghosh and Biswarup Satpati\*

Address: Surface Physics and Material Science Division, Saha Institute of Nuclear  
Physics, HBNI, 1/AF Bidhannagar, Kolkata-700064, India

Email: Biswarup Satpati - biswarup.satpati@saha.ac.in

\* Corresponding author

### Additional experimental data

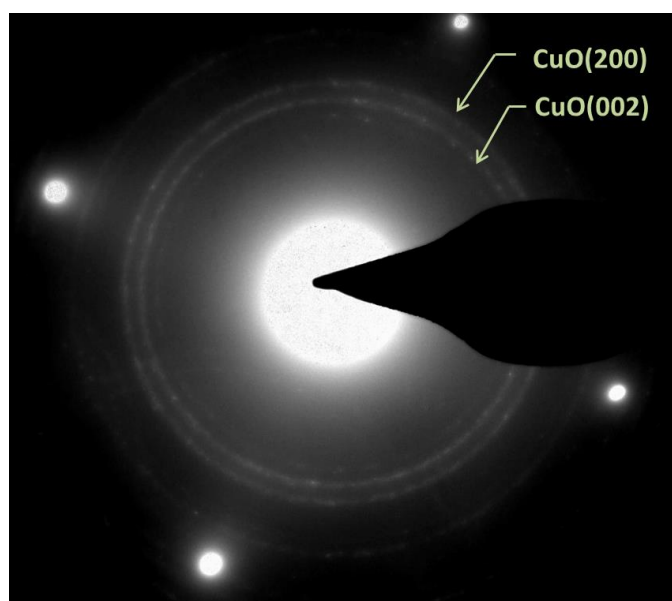

**Figure S1:** The selected area electron diffraction (SAED) of air annealed sample. The ring diffraction pattern shows the formation of CuO.

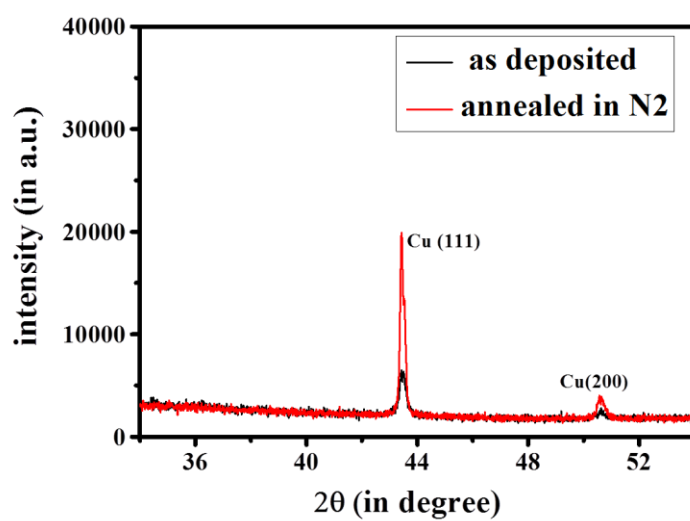

**Figure S2:** XRD patterns of the as deposited and the N<sub>2</sub> environment annealed samples. It is visible that the crystallinity of the Cu nanoparticles remains unchanged.
